# Supplementary material for: An oncogenic role for sphingosine kinase 2
Source: PubMed Central journal article supplement (PMC5323123; doi:10.18632/oncotarget.11714), 2016-08-30
Supplement: oncotarget-07-64886-s001.pdf [file oncotarget-07-64886-s001.pdf]

# An oncogenic role for sphingosine kinase 2

## Supplementary Material

**A**

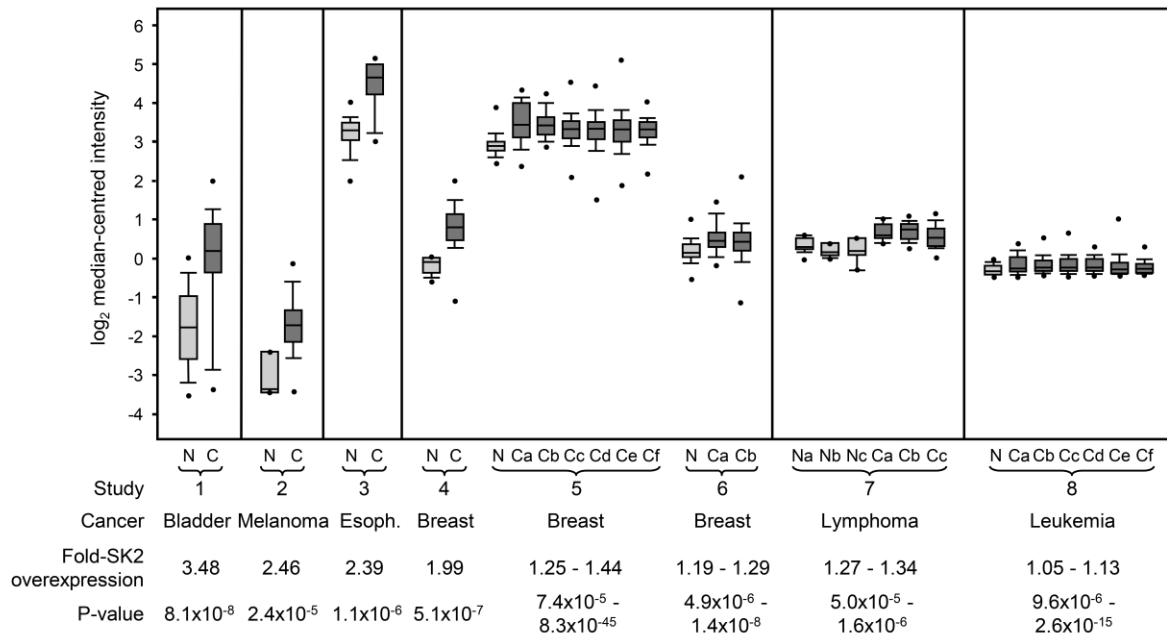

**B**

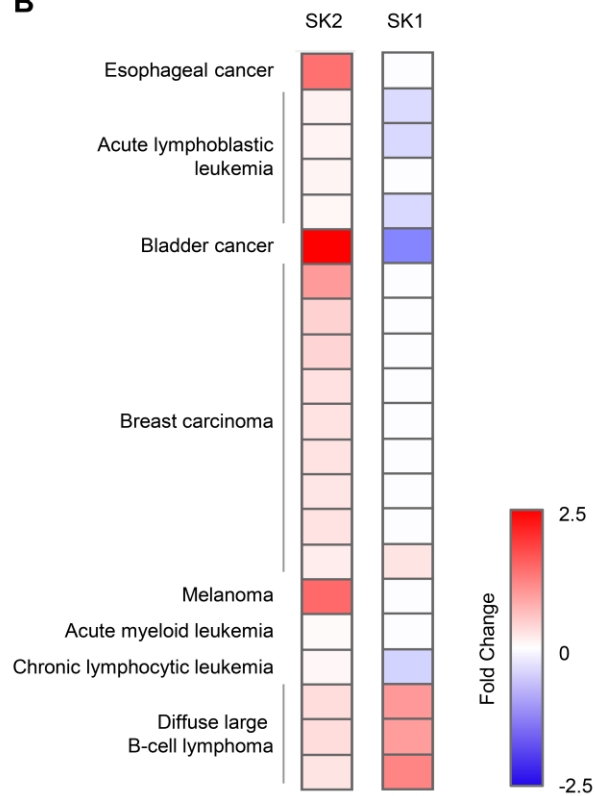

**Supplementary Figure S1: SK2 is upregulated in human cancers. (A)** Box plots showing human cancers with significant upregulation of SK2 mRNA levels. N = normal tissue; C = cancerous tissue. Data were extracted from the Oncomine database, from the following studies: study 1, Sanchez-Carbayo Bladder 2; study 2, Talantov Melanoma; study 3, Kim Esophagus; study 4, Finak Breast; study 5, Curtis Breast; study 6, TCGA Breast; study 7, Compagno Lymphoma; study 8, Haferlach Leukemia. **(B)** Heat map showing significant ( $p < 1 \times 10^{-4}$ ) changes in SK1 mRNA levels in the human cancer datasets described above, as compared with corresponding normal tissues.

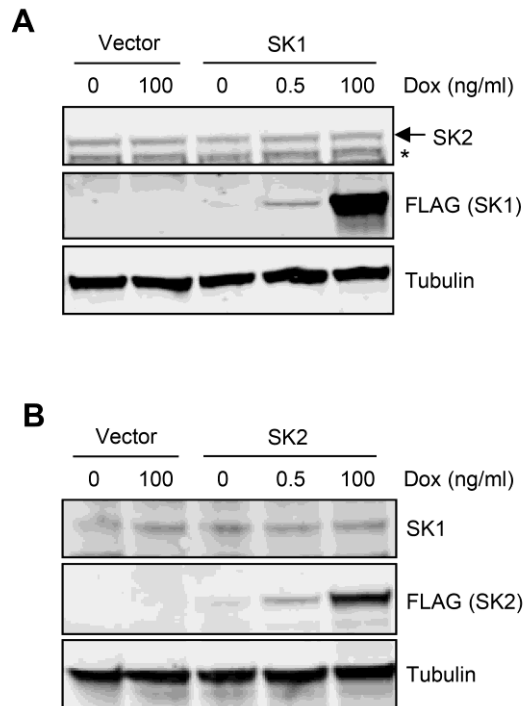

**Supplementary Figure S2: Endogenous SK protein levels remain unchanged in the HEK293 Flp-In T-Rex overexpression systems. (A)** Western blot analysis of endogenous SK2 protein levels in lysates from HEK293 Flp-In T-Rex cells with doxycycline (dox)-induced low- and high-level FLAG-tagged SK1 overexpression, or vector control. Asterisk (\*) denotes a non-specific band. Blots shown are representative of three independent experiments. **(B)** Western blot analysis of endogenous SK1 protein levels in lysates from HEK293 Flp-In T-Rex cells with doxycycline (dox)-induced low- and high-level FLAG-tagged SK2 overexpression, or vector control. Blots shown are representative of three independent experiments.



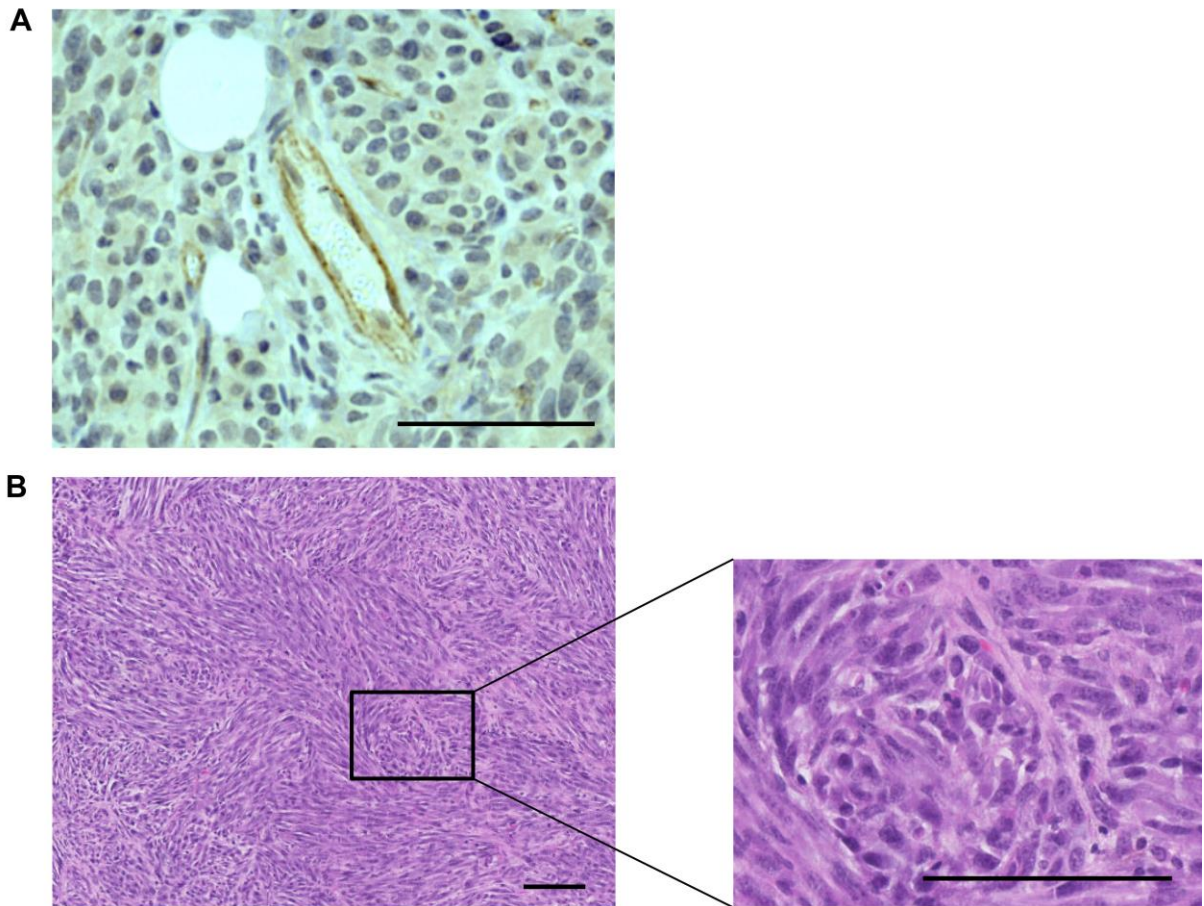

**Supplementary Figure S4: Tumors formed from the transformation of NIH3T3 mouse fibroblasts overexpressing SK2 are vascularized and characteristic of fibrosarcoma. (A)** The presence of vasculature within the tumor tissue sections was examined by PECAM-1 (CD31) staining. A representative image is shown at 20x magnification. Scale bar = 100  $\mu\text{m}$ . **(B)** Morphology of the tumor tissue sections is shown by hematoxylin and eosin staining. The image on the right is a 20x magnification of the area framed in the left (5x magnification) image. Scale bar = 100  $\mu\text{m}$ .
